# Supplementary material for: Alpinumisoflavone attenuates lipopolysaccharide-induced acute lung injury by regulating the effects of anti-oxidation and anti-inflammation both in vitro and in vivo
Source: PubMed Central journal article supplement — RSC Adv. 2018 Sep 7;8(55):31515–28. doi: 10.1039/c8ra04098b (PMC9085634; doi:10.1039/c8ra04098b), 2018-09-07
Supplement: RA-008-C8RA04098B-s001.pdf [file RA-008-C8RA04098B-s001.pdf]

***【supplementary information】***

**Alpinumisoflavone attenuates lipopolysaccharide-induced acute lung injury by regulating the effects of anti-oxidation and anti-inflammation both *in vitro* and *in vivo***

Pei-Ying Li,<sup>†,§</sup> Yu-Chia Liang,<sup>‡,§</sup> Ming-Jyh Sheu,<sup>†</sup> Shyh-Shyun Huang,<sup>†</sup> Che-Yi Chao,<sup>¶</sup> Yueh-Hsiung Kuo,<sup>‡</sup> and Guan-Jhong Huang<sup>\*,‡</sup>

<sup>†</sup> School of Pharmacy, College of Pharmacy, China Medical University, Taichung 40402, Taiwan

<sup>‡</sup> Department of Chinese Pharmaceutical Sciences and Chinese Medicine Resources, College of Chinese Medicine, China Medical University, Taichung 40402, Taiwan

<sup>¶</sup> Department of Food Nutrition and Health Biotechnology, Asia University, Taichung 41354, Taiwan

\*Corresponding author:

Dr. Guan-Jhong Huang: [gjhuang@mail.cmu.edu.tw](mailto:gjhuang@mail.cmu.edu.tw); Tel: +886-4-22053366 Ext. 5508

§Equal contributors

Received: date; Accepted: date; Published: date

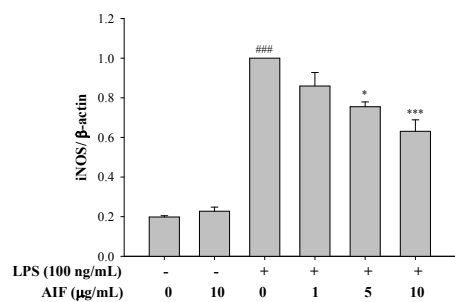

Figure S1. Effects of AIF regarding the expression of iNOS in LPS-induced MH-S cells.

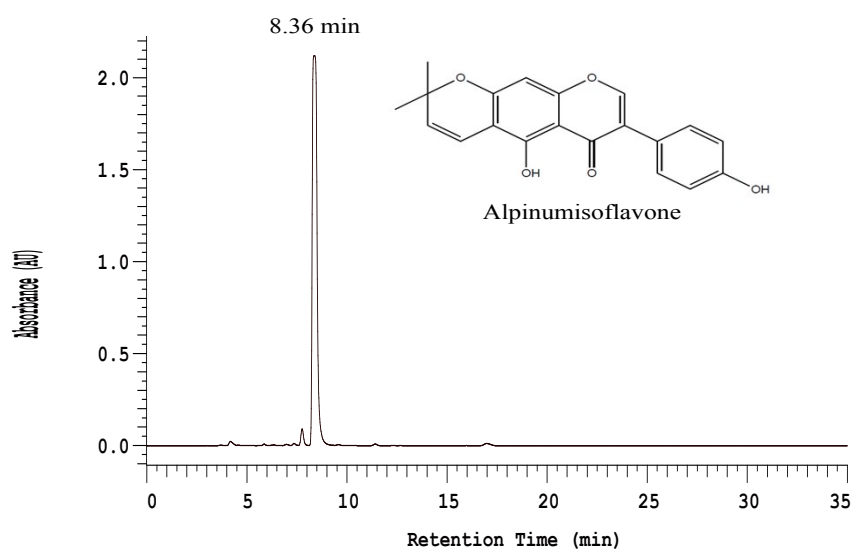

Figure S2. The HPLC profile of alpinumisoflavone (AIF).

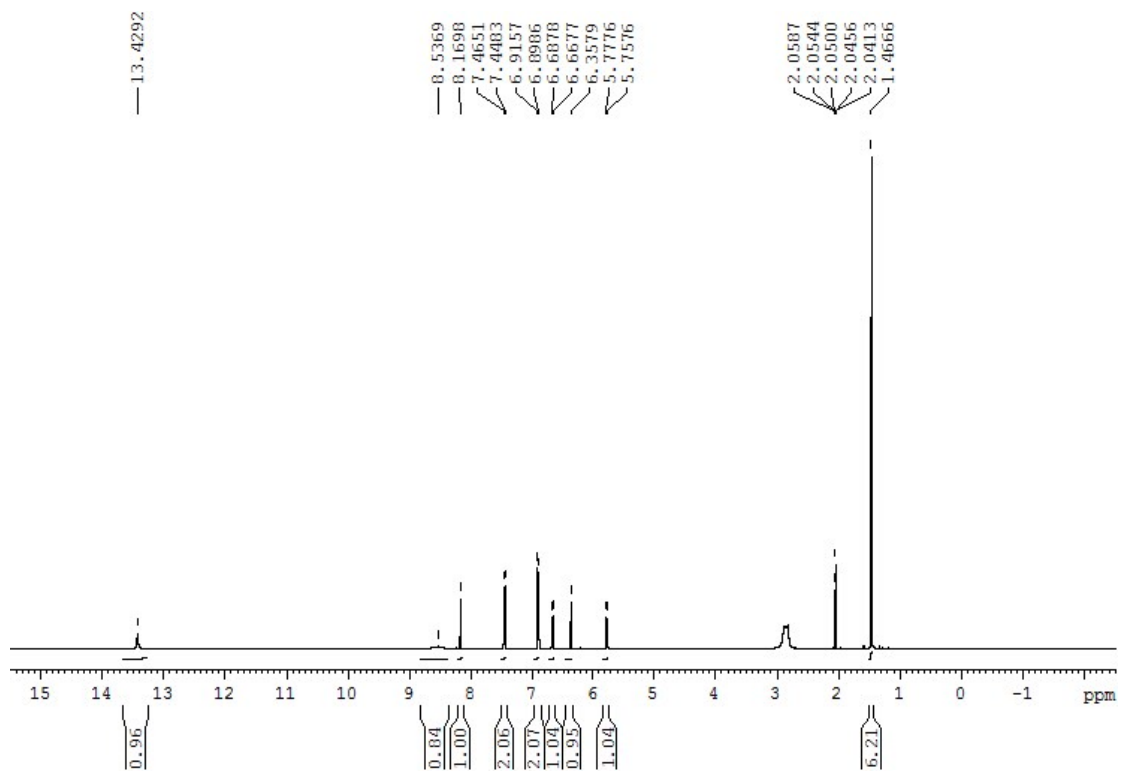

Figure S3. The  $^1\text{H}$  NMR spectrum of alpinumisoflavone (AIF) in Acetone- $d_6$  (500 MHz,  $\delta$  in ppm).

Table S1. IC<sub>50</sub> of AIF.

|     | Survival ability<br>IC <sub>50</sub> (μg/mL) | NO inhibition<br>IC <sub>50</sub> (μg/mL) |
|-----|----------------------------------------------|-------------------------------------------|
| AIF | 64.37                                        | 4.87                                      |

Table S2. Survival ability and NO inhibition of AIF.

| AIF (μg/mL) | LPS (100 ng/mL) | Survival ability (%) | NO inhibition (%)           |
|-------------|-----------------|----------------------|-----------------------------|
| 0           | -               | 102.00 ± 2.97        | 89.72 ± 1.09                |
| 0           | +               | 100.00 ± 0.00        | 0.00 ± 0.00 <sup>###</sup>  |
| 1           | +               | 99.53 ± 2.87         | 13.72 ± 1.89                |
| 5           | +               | 99.31 ± 3.56         | 51.25 ± 9.50 <sup>***</sup> |
| 10          | +               | 102.22 ± 1.80        | 72.74 ± 7.61 <sup>***</sup> |
| 20          | +               | 98.17 ± 5.03         | 75.41 ± 3.17 <sup>***</sup> |
| 30          | +               | 97.05 ± 8.08         | 79.01 ± 2.31 <sup>***</sup> |
| 40          | +               | 93.84 ± 7.14         | 79.29 ± 1.85 <sup>***</sup> |
| 50          | +               | 81.87 ± 3.36         | 80.66 ± 2.56 <sup>***</sup> |
| 60          | +               | 69.93 ± 0.54         | 83.20 ± 2.75 <sup>***</sup> |
| 70          | +               | 24.33 ± 1.31         | 83.48 ± 2.59 <sup>***</sup> |
| 80          | +               | 9.72 ± 0.39          | 83.95 ± 2.00 <sup>***</sup> |
| 100         | +               | 6.39 ± 0.67          | 86.55 ± 0.85 <sup>***</sup> |
